# Supplementary material for: Changing Body Weight–Based Dosing to a Flat Dose for Avelumab in Metastatic Merkel Cell and Advanced Urothelial Carcinoma
Source: PubMed Central journal article supplement — Clin Pharmacol Ther. 2019 Nov 18;107(3):588–96. doi: 10.1002/cpt.1645 (PMC7027979; doi:10.1002/cpt.1645), 2019-11-18
Supplement: CPT-107-588-s002.pdf [file CPT-107-588-s002.pdf]

Figure S1: Weight distribution for the study population.

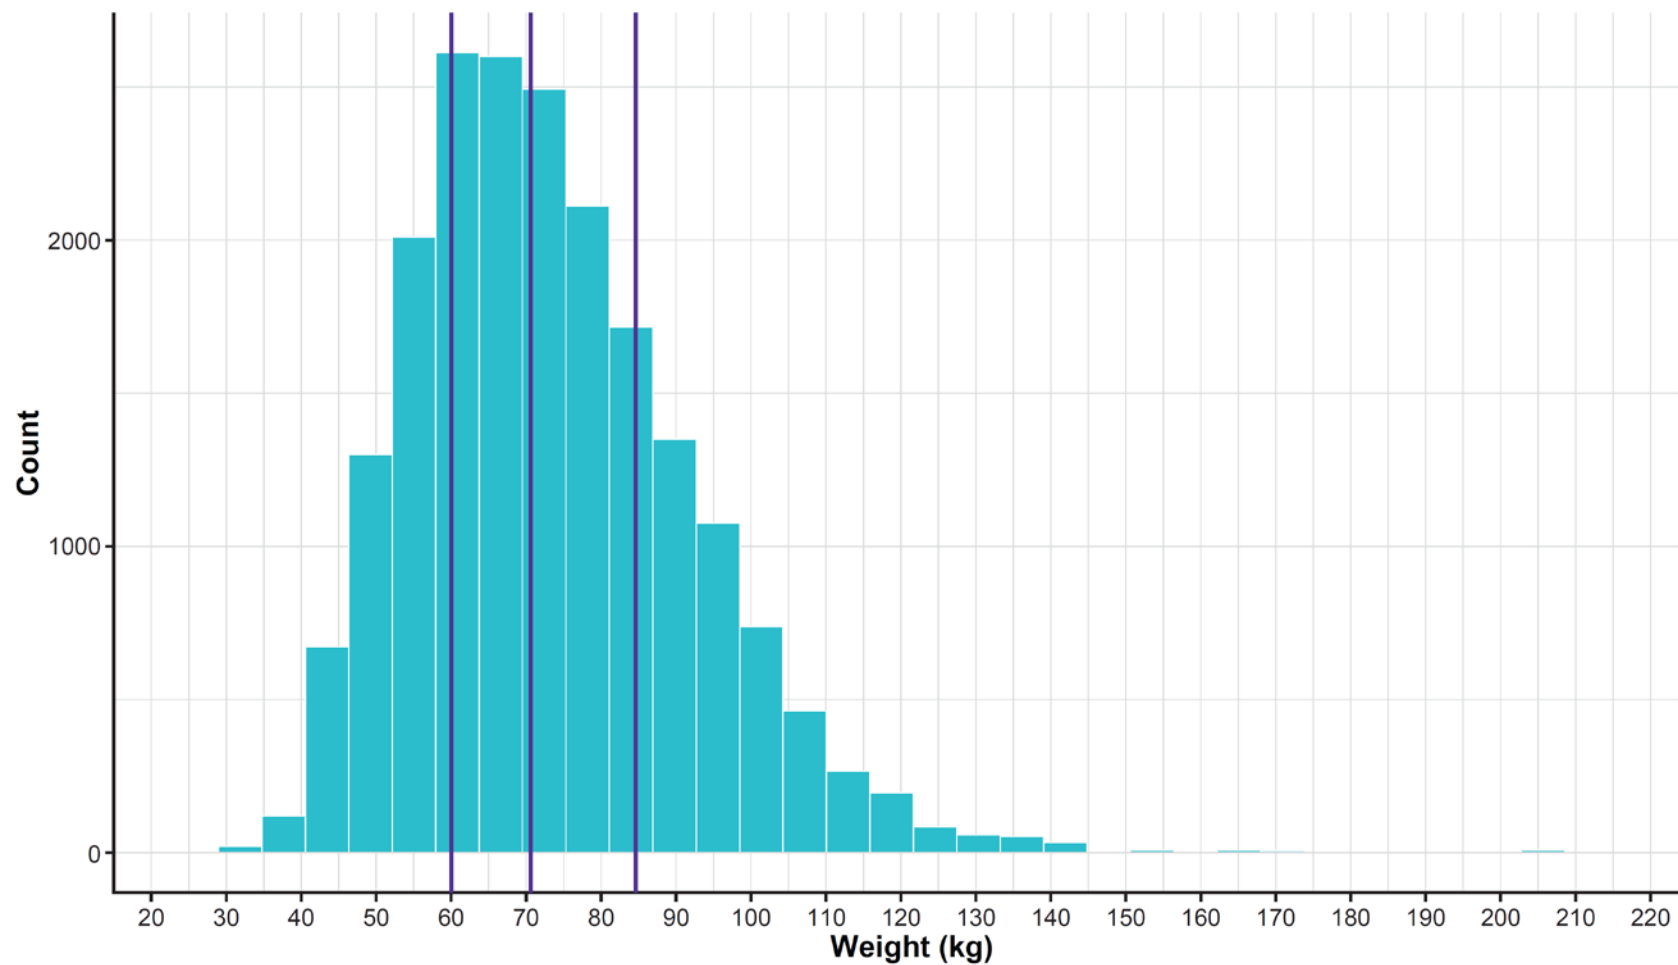

Solid vertical lines represent the 25th percentile (60.0 kg), median (70.6 kg), and 75th percentile (84.6 kg) of weight.
