# Supplementary material for: Changing Body Weight–Based Dosing to a Flat Dose for Avelumab in Metastatic Merkel Cell and Advanced Urothelial Carcinoma
Source: PubMed Central journal article supplement — Clin Pharmacol Ther. 2019 Nov 18;107(3):588–96. doi: 10.1002/cpt.1645 (PMC7027979; doi:10.1002/cpt.1645), 2019-11-18
Supplement: CPT-107-588-s003.pdf [file CPT-107-588-s003.pdf]

**Figure S2: Simulated exposure values for weight-based (10 mg/kg Q2W) and flat (800 mg Q2W) dosing of avelumab by extremes of weight using the first-cycle population pharmacokinetic model.**

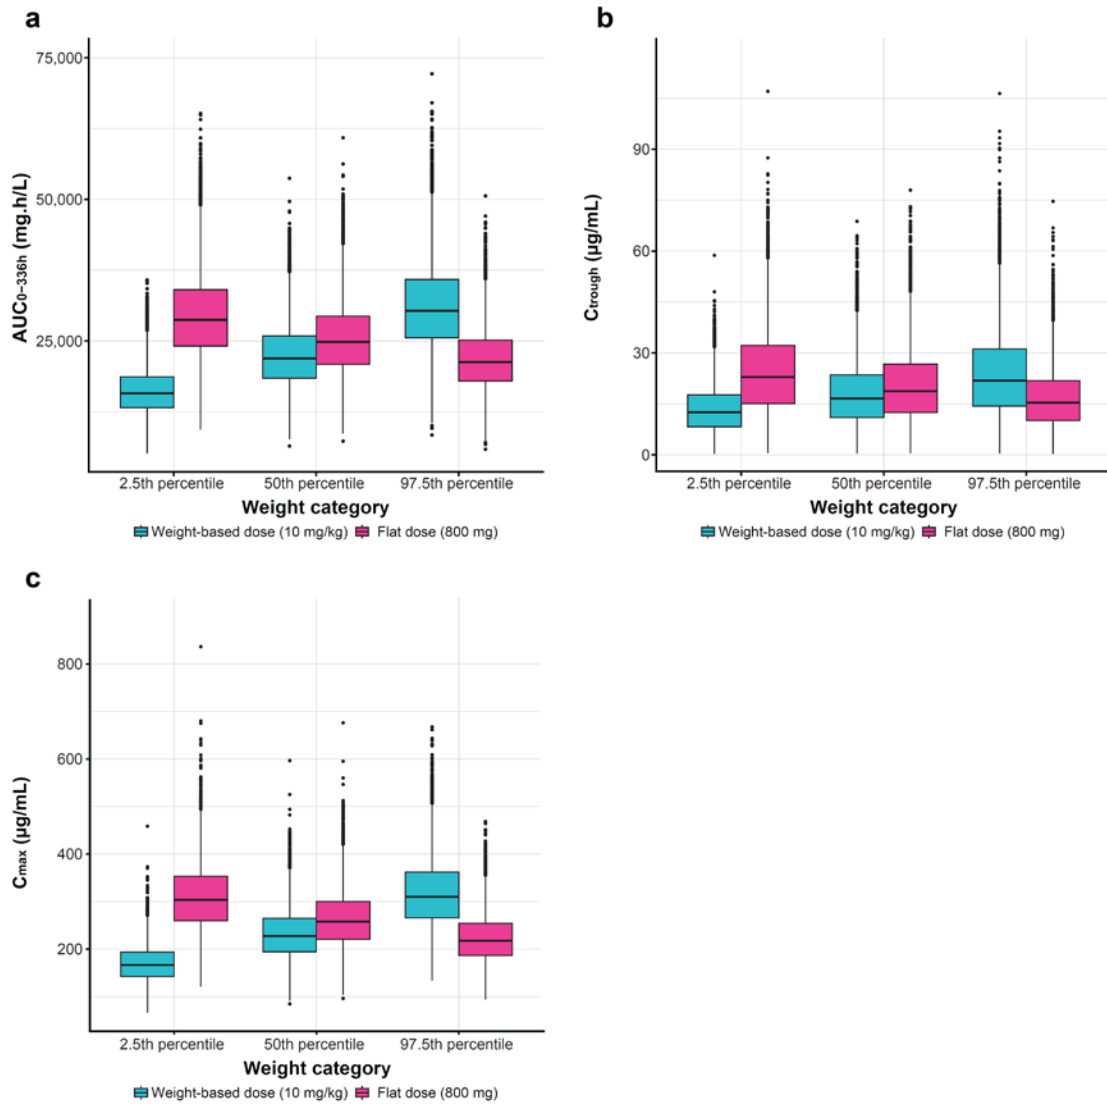

**(a) AUC<sub>0-336h</sub>, (b) C<sub>trough</sub>, and (c) C<sub>max</sub>.** AUC, area under the curve; C<sub>trough</sub> trough concentration after first dose; C<sub>max</sub>, maximum concentration after first dose; Q2W, every 2 weeks.
