# Supplementary material for: Changing Body Weight–Based Dosing to a Flat Dose for Avelumab in Metastatic Merkel Cell and Advanced Urothelial Carcinoma
Source: PubMed Central journal article supplement — Clin Pharmacol Ther. 2019 Nov 18;107(3):588–96. doi: 10.1002/cpt.1645 (PMC7027979; doi:10.1002/cpt.1645), 2019-11-18
Supplement: CPT-107-588-s004.pdf [file CPT-107-588-s004.pdf]

**Figure S3: Simulated exposure values for weight-based (10 mg/kg Q2W) and flat (800 mg Q2W) dosing of avelumab by extremes of weight using the steady-state population pharmacokinetic model.**

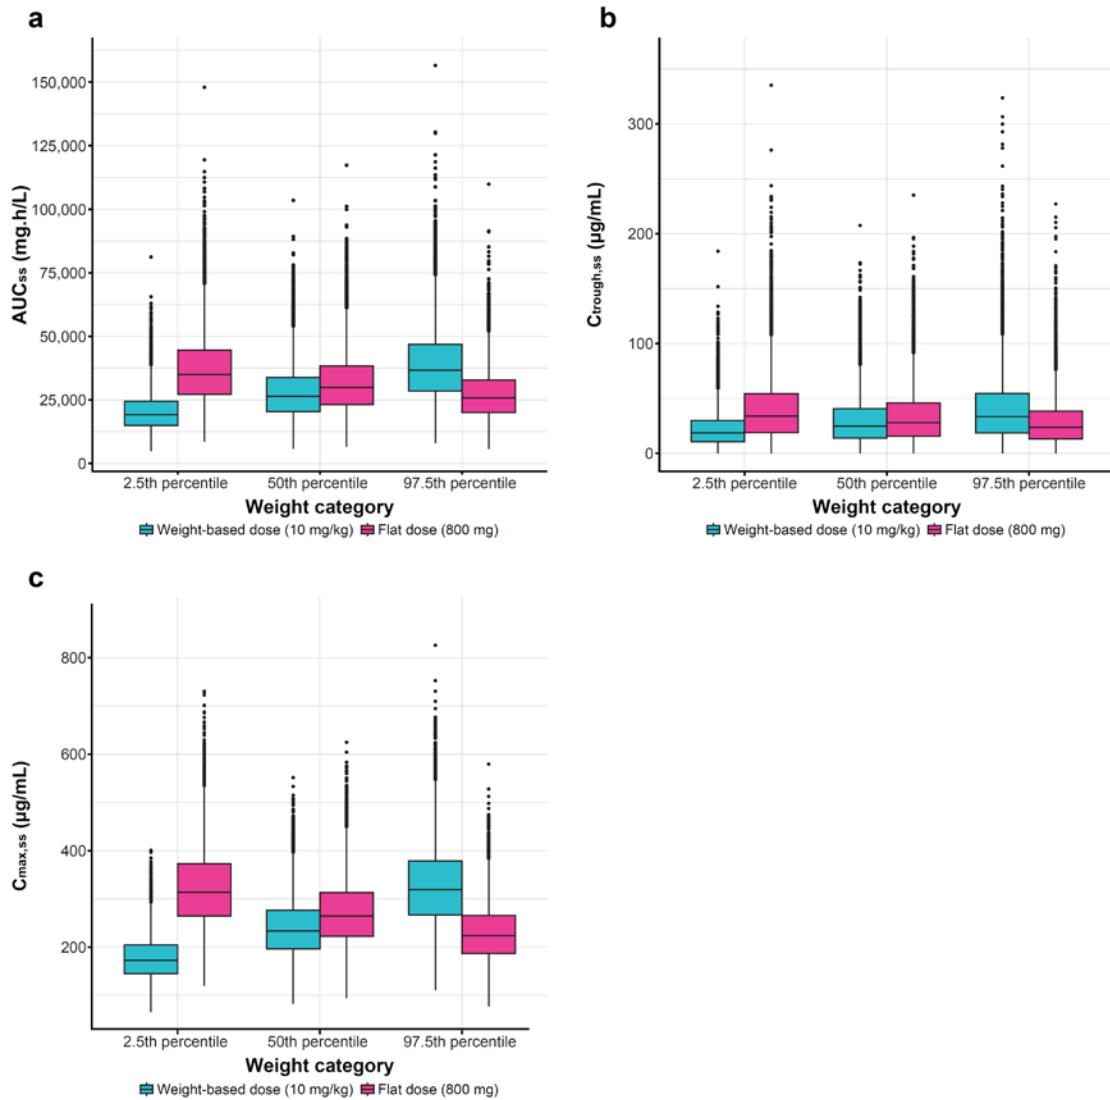

**(a) AUC<sub>ss</sub>, (b) C<sub>trough,ss</sub>, and (c) C<sub>max,ss</sub>.** AUC<sub>ss</sub>, steady state area under the curve; C<sub>trough,ss</sub> steady state trough concentration; C<sub>max,ss</sub>, steady state maximum concentration; Q2W, every 2 weeks.
