# Supplementary material for: Changing Body Weight–Based Dosing to a Flat Dose for Avelumab in Metastatic Merkel Cell and Advanced Urothelial Carcinoma
Source: PubMed Central journal article supplement — Clin Pharmacol Ther. 2019 Nov 18;107(3):588–96. doi: 10.1002/cpt.1645 (PMC7027979; doi:10.1002/cpt.1645), 2019-11-18
Supplement: CPT-107-588-s005.pdf [file CPT-107-588-s005.pdf]

Figure S4: Simulated  $C_{\text{trough,ss}}$  values for weight-based (10 mg/kg Q2W) and flat (800 mg Q2W) dosing of avelumab using the steady-state population pharmacokinetic model.

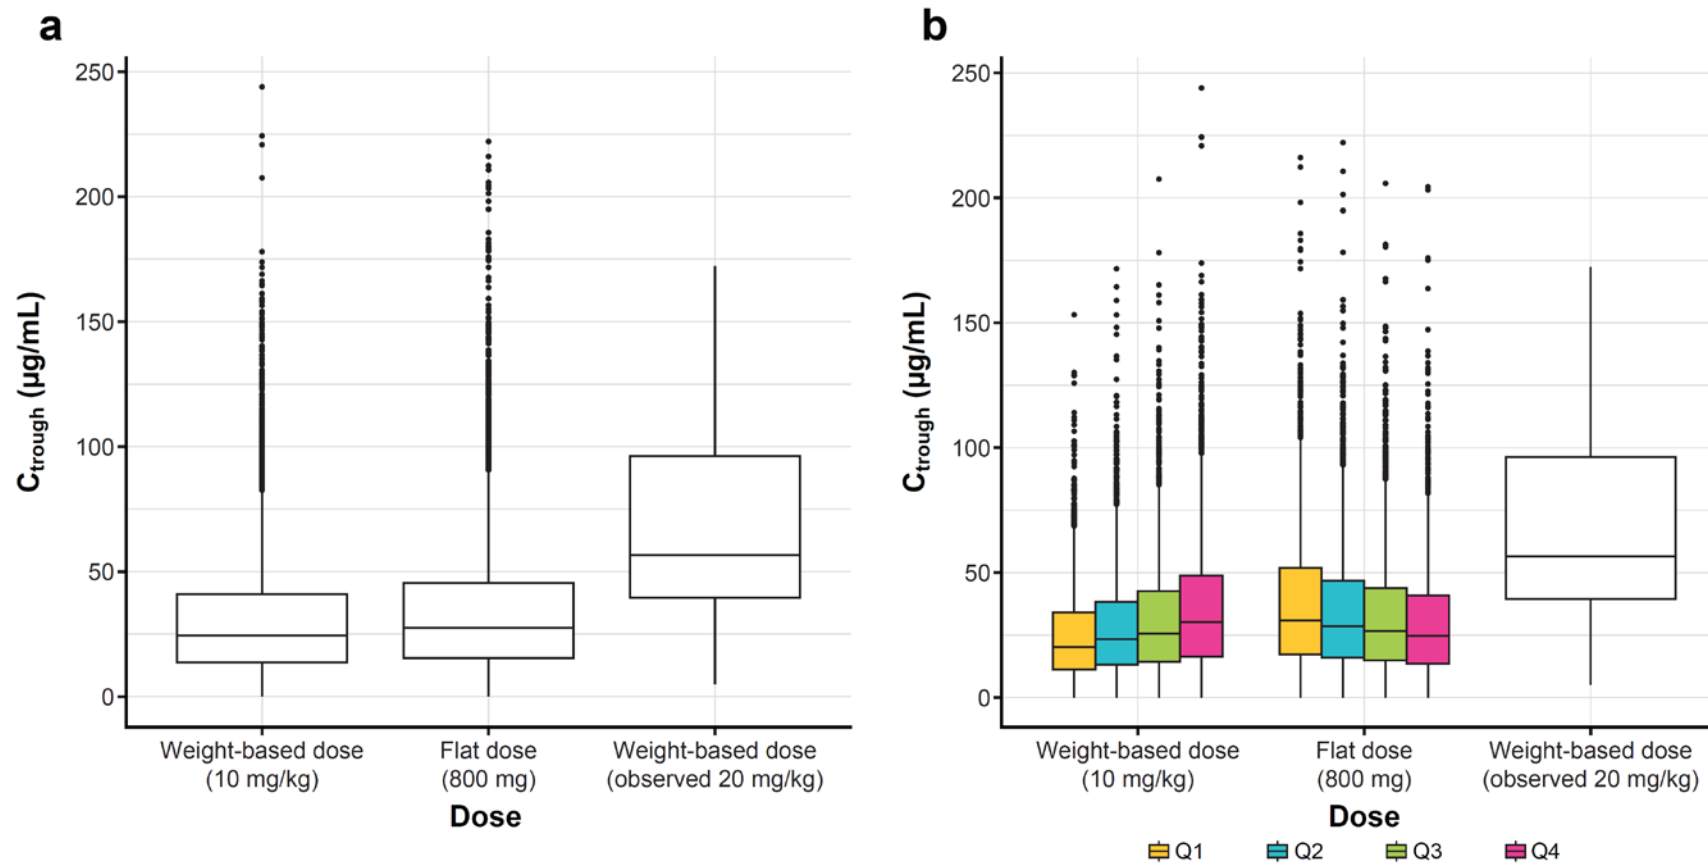

Box and whisker plots for (a) the entire population and (b) the population split by quartiles of weight; observed data with avelumab 20 mg/kg dosing is included for comparison purposes ( $n = 27$ ).  $C_{\text{trough,ss}}$ , steady-state trough concentration; Q2W, every 2 weeks.
