# Supplementary material for: Changing Body Weight–Based Dosing to a Flat Dose for Avelumab in Metastatic Merkel Cell and Advanced Urothelial Carcinoma
Source: PubMed Central journal article supplement — Clin Pharmacol Ther. 2019 Nov 18;107(3):588–96. doi: 10.1002/cpt.1645 (PMC7027979; doi:10.1002/cpt.1645), 2019-11-18
Supplement: CPT-107-588-s006.pdf [file CPT-107-588-s006.pdf]

**Figure S5: Mean probability of experiencing an irAE (upper panels) or IRR (lower panels) for weight-based (10 mg/kg Q2W) and flat (800 mg Q2W) dosing with avelumab based on the steady-state population pharmacokinetic model.**

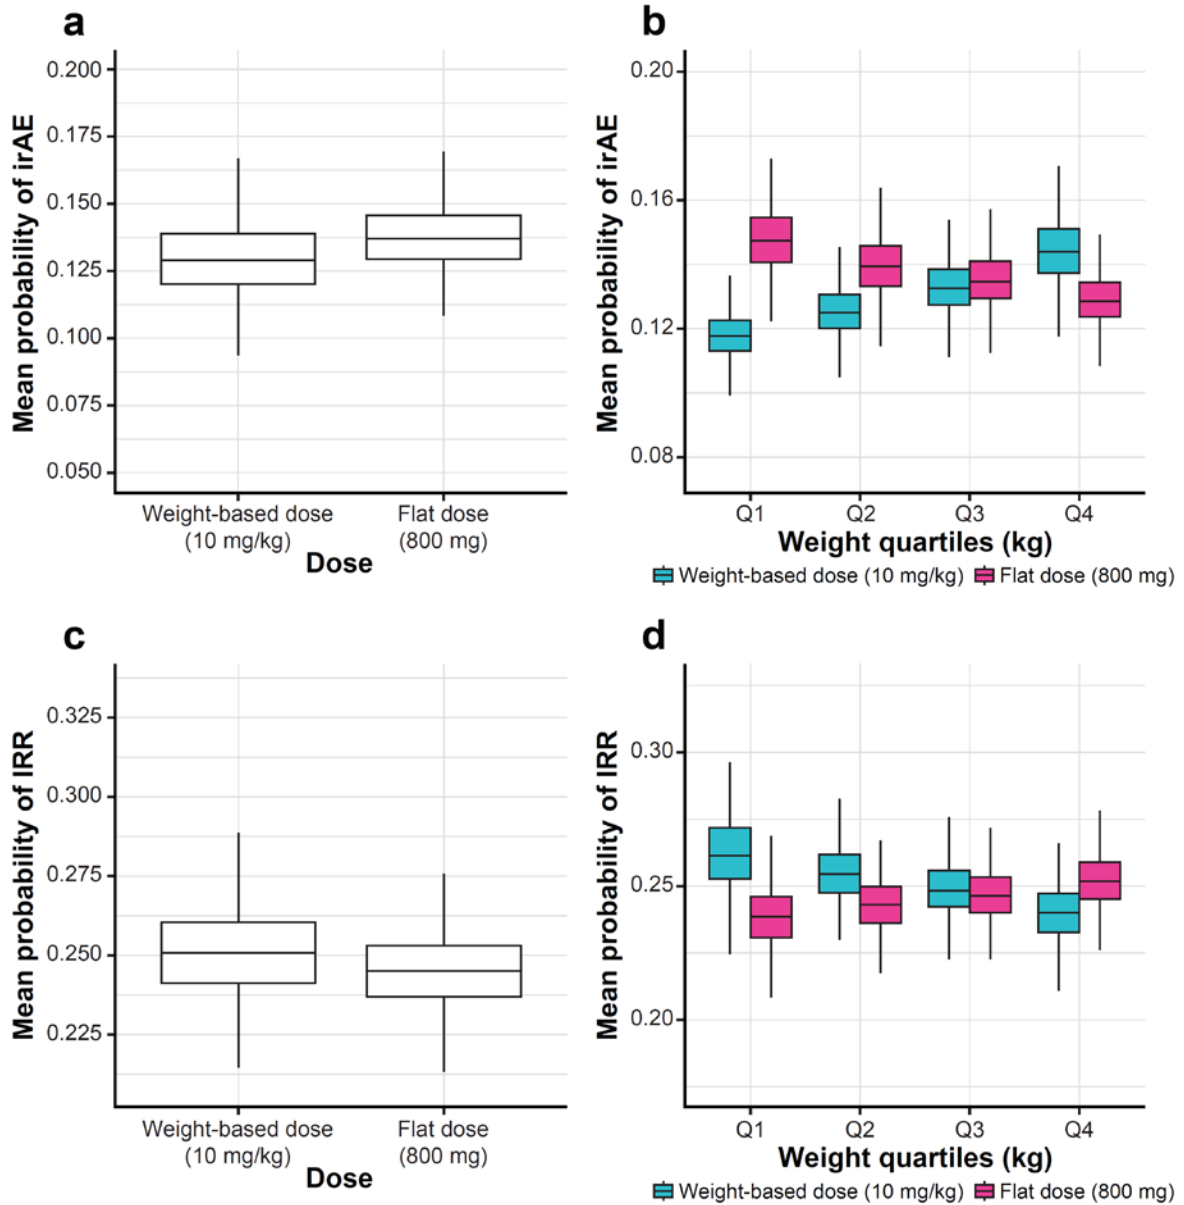

Box and whisker plots for (a) probability of irAEs based on  $C_{trough,ss}$  in all patients; (b) probability of irAEs based on  $C_{trough,ss}$  stratified by quartiles of weight; (c) box and whisker plots for probability of IRRs based on  $C_{max,ss}$  in all patients; and (d) probability of IRRs based on  $C_{max,ss}$  stratified by quartiles of weight.  $C_{max,ss}$ , steady-state maximum concentration;  $C_{trough,ss}$ , steady-state trough concentration; irAE, immune-related adverse event; IRR, infusion-related reaction; Q2W, every 2 weeks.
