# Supplementary material for: Changing Body Weight–Based Dosing to a Flat Dose for Avelumab in Metastatic Merkel Cell and Advanced Urothelial Carcinoma
Source: PubMed Central journal article supplement — Clin Pharmacol Ther. 2019 Nov 18;107(3):588–96. doi: 10.1002/cpt.1645 (PMC7027979; doi:10.1002/cpt.1645), 2019-11-18
Supplement: CPT-107-588-s007.pdf [file CPT-107-588-s007.pdf]

**Figure S6: Mean probability of objective response in patients with mMCC (upper panels) or advanced/metastatic UC (lower panels) for weight-based (10 mg/kg Q2W) and flat (800 mg Q2W) dosing with avelumab based on  $C_{trough,ss}$  (steady-state population pharmacokinetic model).**

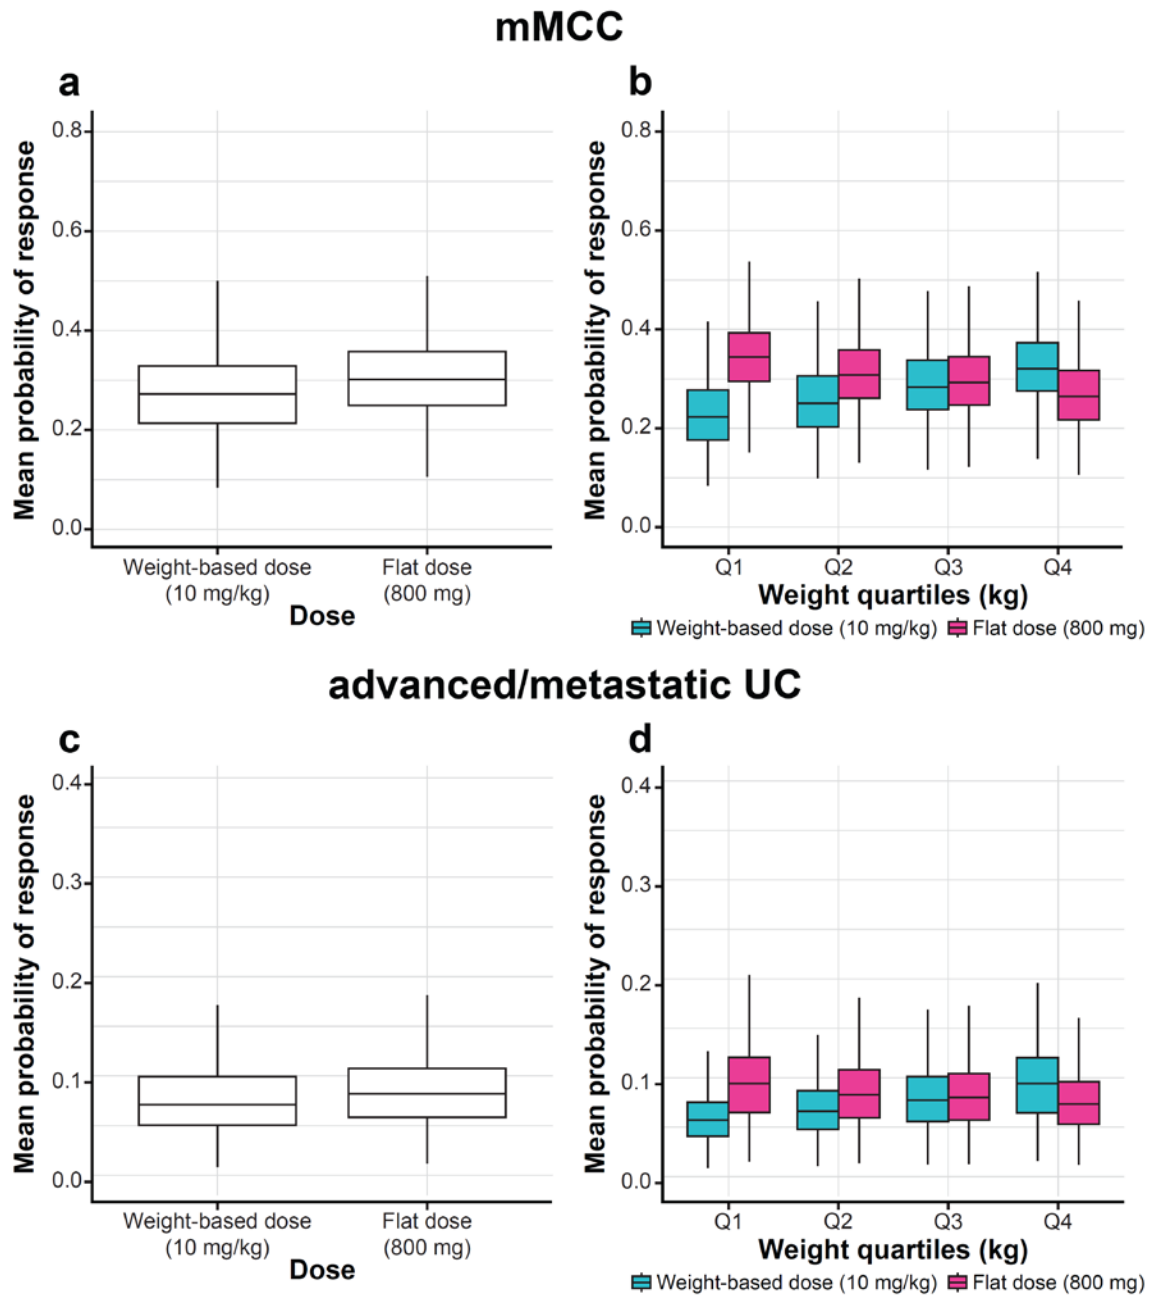

Box and whisker plots in (a) all patients with mMCC; (b) patients with mMCC stratified by quartiles of weight; (c) all patients with advanced/metastatic UC; and (d) in patients with advanced/metastatic UC stratified by quartiles of weight.  $C_{trough,ss}$ , steady-state trough concentration; mMCC, metastatic Merkel cell carcinoma; Q2W, every 2 weeks; UC, urothelial carcinoma.
